# Supplementary material for: Structural Recognition of Triple-Stranded DNA by Surface-Enhanced Raman Spectroscopy
Source: MDPI journal article supplement (doi:10.3390/nano11020326), 2021-01-27
Supplement: s1 [file s1]

## SUPPLEMENTARY INFORMATION

### Structural Recognition of Triple-Stranded DNA by Surface-Enhanced Raman Spectroscopy

Luca Guerrini <sup>1,\*</sup> and Ramon A. Alvarez-Puebla <sup>1,2,\*</sup>

<sup>1</sup> Department of Physical and Inorganic Chemistry — EMaS, Universitat Rovira I Virgili, Carrer de Marcel·lí Domingo s/n, 43007 Tarragona, Spain

<sup>2</sup> ICREA, Passeig Lluís Companys 23, 08010 Barcelona, Spain.

\* Correspondence: luca.guerrini@urv.cat (L.G.); ramon.alvarez@urv.cat (R.A.A.-P.)

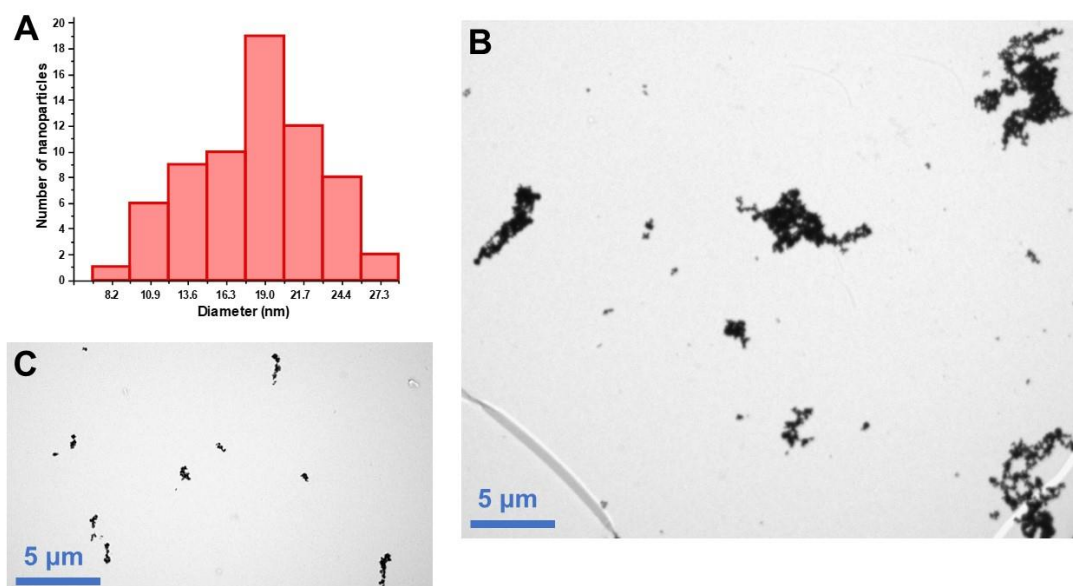

**Figure S1.** (A) Size histograms of AgSp nanoparticles (N = 70). (B, C) Representative TEM image of AgSp colloids (150 μL) upon addition of 0.9 μL of (B) triplex buffer or (C) a 20 μM solution of D<sub>1</sub>D<sub>2</sub> duplex in triplex buffer. Triplex buffer: sodium-magnesium phosphate buffer solution pH 7, 120 mM NaCl, 8 mM Mg<sup>2+</sup>.

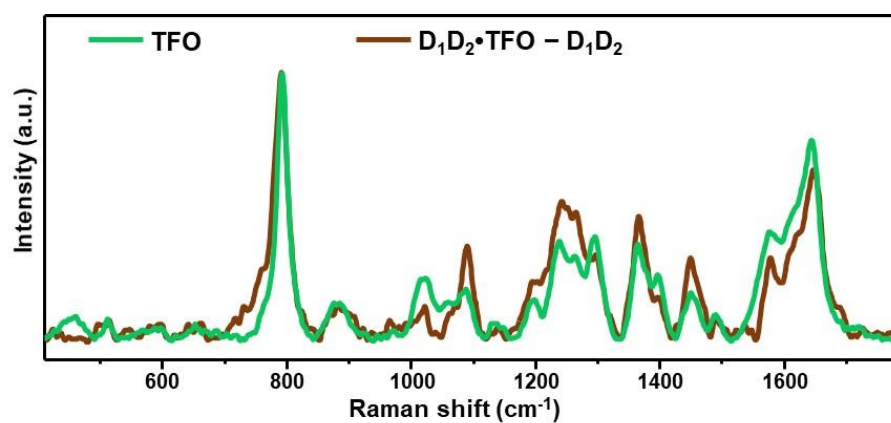

**Figure S2.** SERS spectrum of TFO and difference spectrum  $D_1D_2 \bullet TFO - D_1D_2$ . For the sake of a better comparison, the intensity of the spectra was arbitrarily normalized to the intensity of the ring breathing band at ca. 790  $\text{cm}^{-1}$ .

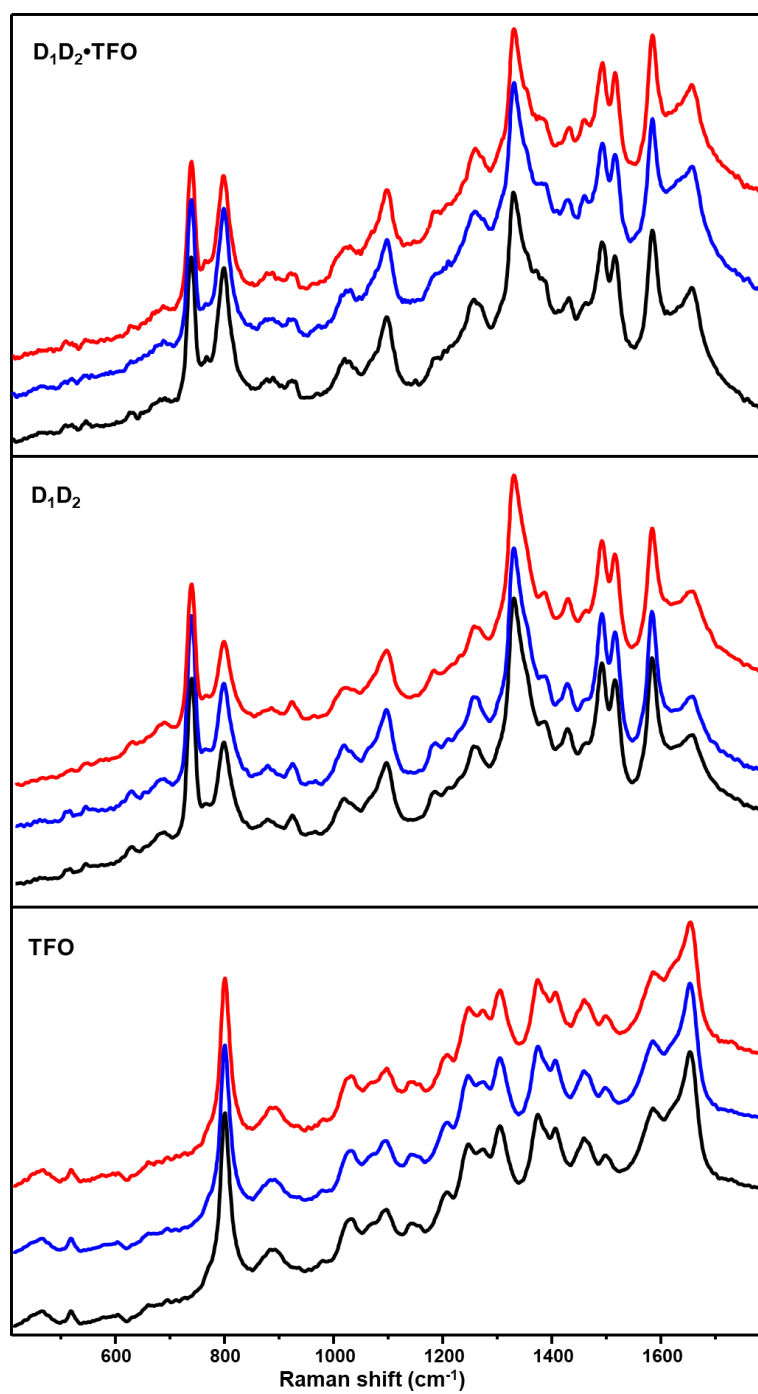

**Figure S3.** Original non-baseline SERS spectra of TFO, D<sub>1</sub>D<sub>2</sub>•TFO and D<sub>1</sub>D<sub>2</sub> from different replicas.
